# Supplementary material
Source: Springer Nature journal article supplement (https://www.springermedizin.de/resource/supplementary/12889_2011_3634_MOESM1_ESM.pdf/9489456)

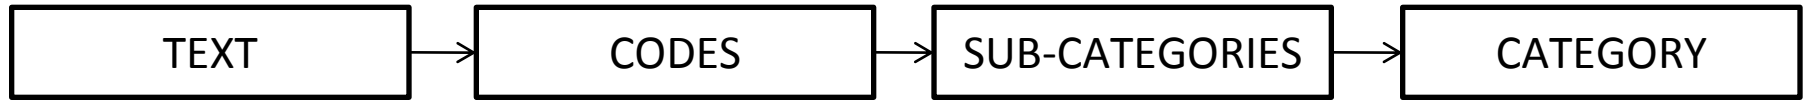

Girl: I was very surprised. At first I thought that they might have done wrong. But then, when I found out that I had it, then, well, at first, I thought that I still didn't have it.

Girl: It felt really strange when you heard about it. I thought that then there must be a lot in my class who also have got it, because I look just like all the others [...].

Boy: At first I was like WHAT! But then when I found out I didn't care, or I cared, but I did not think it really was much of a difference, because I didn't quite understand what it meant.  
(Focus group discussion)

Surprised  
A mistake?  
Still didn't believe  
Denial

Felt strange  
Only me?  
Loss of normality

Surprised  
Didn't care  
Didn't quite understand

Couldn't be true

Suddenly turning different

Didn't understand what it meant

**LIKE A BOLT OF LIGHTNING**

*Other text segments*

*Other codes*

*Other sub-categories*

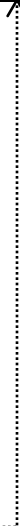

Supplement: MOESM1 [file 9489456]
